# Supplementary material for: Hydrogenolysis of methyl glycolate to ethanol over a Pt–Cu/SiO2single-atom alloy catalyst: a further step from cellulose to ethanol
Source: Royal Society of Chemistry journal article supplement (doi:10.1039/c8gc00309b), 2018-01-01
Supplement: c8gc00309b1.pdf [file c8gc00309b1.pdf]

## Supporting Information

### Supporting Information for: Hydrogenolysis of methyl glycolate to ethanol over Pt-Cu/SiO<sub>2</sub> single-atom alloy catalyst: a further step from cellulose to ethanol

Chaojun Yang,<sup>a,b</sup> Zhili Miao,<sup>a</sup> Fan Zhang,<sup>a,b</sup> Lin Li,<sup>a</sup> Yanting Liu,<sup>a</sup> Aiqin Wang,<sup>a,\*</sup> and Tao Zhang<sup>a,\*</sup>

<sup>a</sup> State Key Laboratory of Catalysis, iChEM (Collaborative Innovation Center of Chemistry for Energy Materials), Dalian Institute of Chemical Physics, Chinese Academy of Sciences, Dalian 116023, China.

<sup>b</sup> University of Chinese Academy of Sciences, Beijing 100049, China.

Corresponding authors: aqwang@dicp.ac.cn; taozhang@dicp.ac.cn

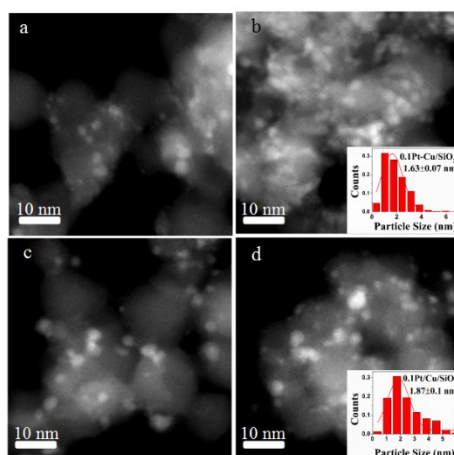

Figure S1. HAADF-STEM images of 0.1Pt-Cu/SiO<sub>2</sub> before (a,b) and after (c,d) the reaction.

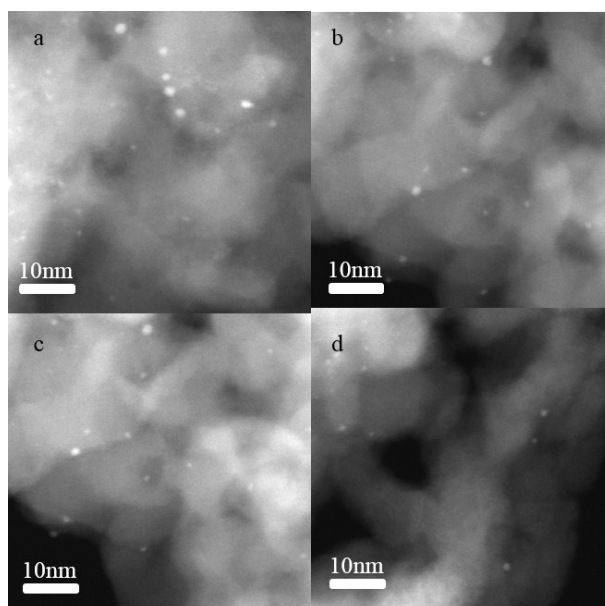

Figure S2. HAADF-STEM images of 0.1Pt/SiO<sub>2</sub> after reduction.

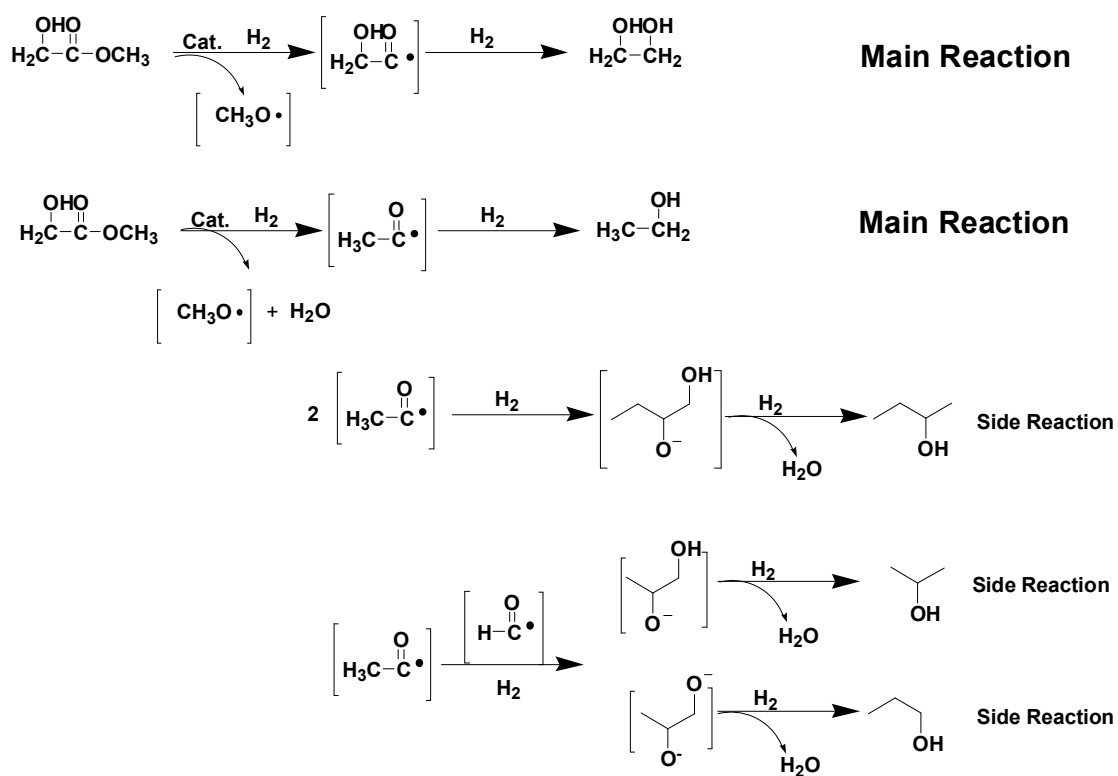

Scheme S1. The proposed reaction pathway for MG hydrogenation.
